# Supplementary material for: The Validity and Reliability of Self-Reported Adherence to Using Offloading Treatment in People with Diabetes-Related Foot Ulcers
Source: MDPI journal article supplement (doi:10.3390/s23094423), 2023-04-30
Supplement: s1 [file s1]

## Supplementary material file S1

1. Please estimate the percentage of steps you wear the offloading device of all the steps you walk in an average day: Circle **any number on the line** ranging from 0 to 100 to indicate your adherence. 0% means you don't wear the offloading device in any steps, 50% means you wear the offloading device in half of your daily steps and 100% means you consistently wear the offloading device for every single step"

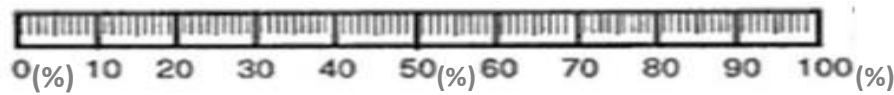

0%=Not wearing the  
device in any step

50%=Wearing the device  
in half of daily steps

100%=Wearing the  
device for every single  
step
